# Supplementary material
Source: MDPI journal article supplement (https://www.mdpi.com/2073-4441/13/16/2297)
Supplement: s1 [file s1 › water-1309156-supplementary.pdf]

# Ice Melt-Induced Variations of Structural and Functional Traits of the Aquatic Microbial Community along an Arctic River (Pasvik River, Norway)

## Supplementary Materials

**Figure S1:** Distribution of chlorophyll-a (chl<sub>a</sub>; line in green) and phaeopigments (phaeo; line in red) concentrations, and percentage of size-fractions (micro-, nano- and pico-phytoplankton) at the riverine and brackish stations of the Pasvik River during the two seasonal sampling. May, Ice-melt (–); July, Ice-melt (+);

**Figure S2:** Phylogenetic groups retrieved in May, (Ice-melt(–)), and July, Ice-melt(+), at each sampling site along the Pasvik River;

**Figure S3:** Venn diagrams showing the OTU-sharing between Ice-melting(–) and July (Ice-melting(+)) conditions and areas (riverine and brackish): a) riverine and brackish stations in Ice-melt(–); b) riverine and brackish stations in Ice-melt(+); c) riverine stations; d) brackish stations; e) all season/site groups;

**Figure S4:** Venn diagrams representing OTU-sharing between samples: a) riverine stations in May; b) riverine stations in July; c) brackish stations in May; d) brackish stations in July.

**Table S1:** Total number of sequence reads, good quality reads, observed numbers of OTUs, Shannon diversity, Evenness and Chao 1 indices per sample of the bacterial 16S rRNA gene data sets.

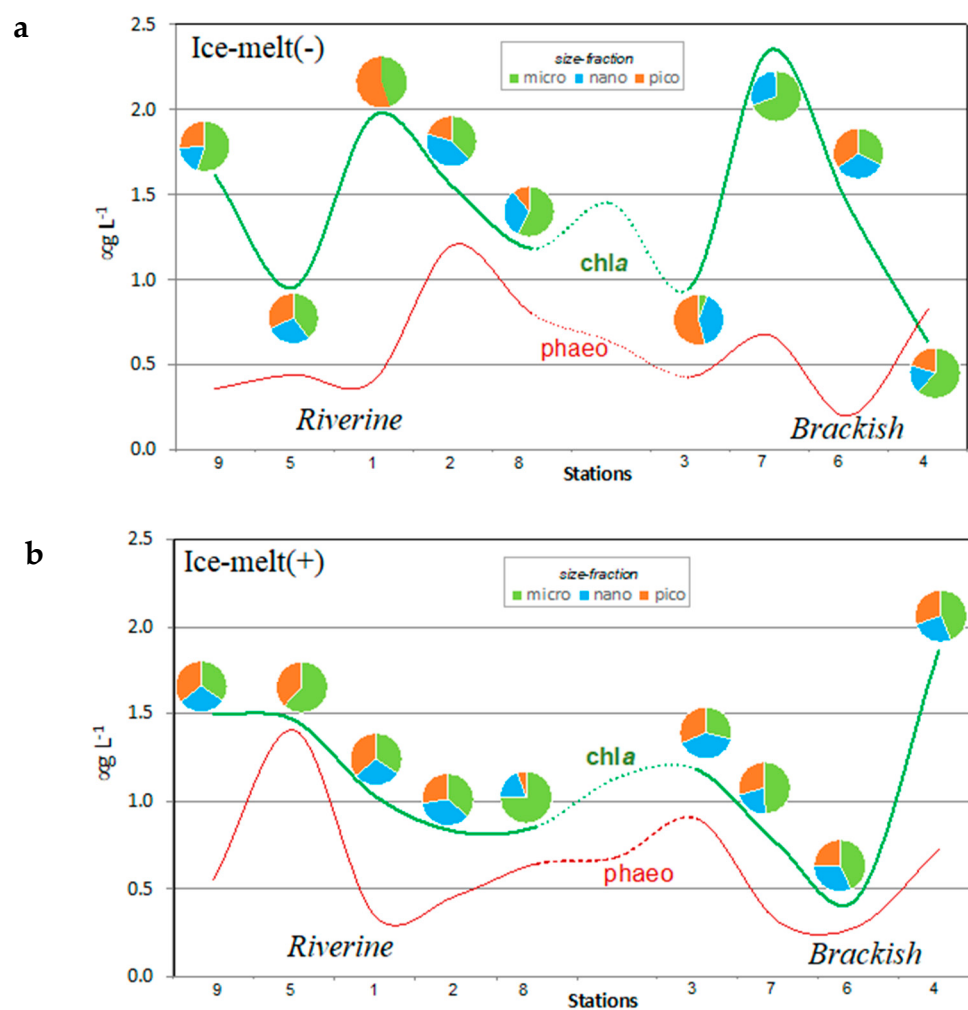

**Supplementary Figure S1.** Distribution of chlorophyll-a (chl-a; line in green) and phaeopigments (phaeo; line in red) concentrations, and percentage of size-fractions (micro-, nano- and pico-phytoplankton) at the riverine and brackish stations of the Pasvik River during the two seasonal sampling. May, Ice-melt (-); July, Ice-melt (+).

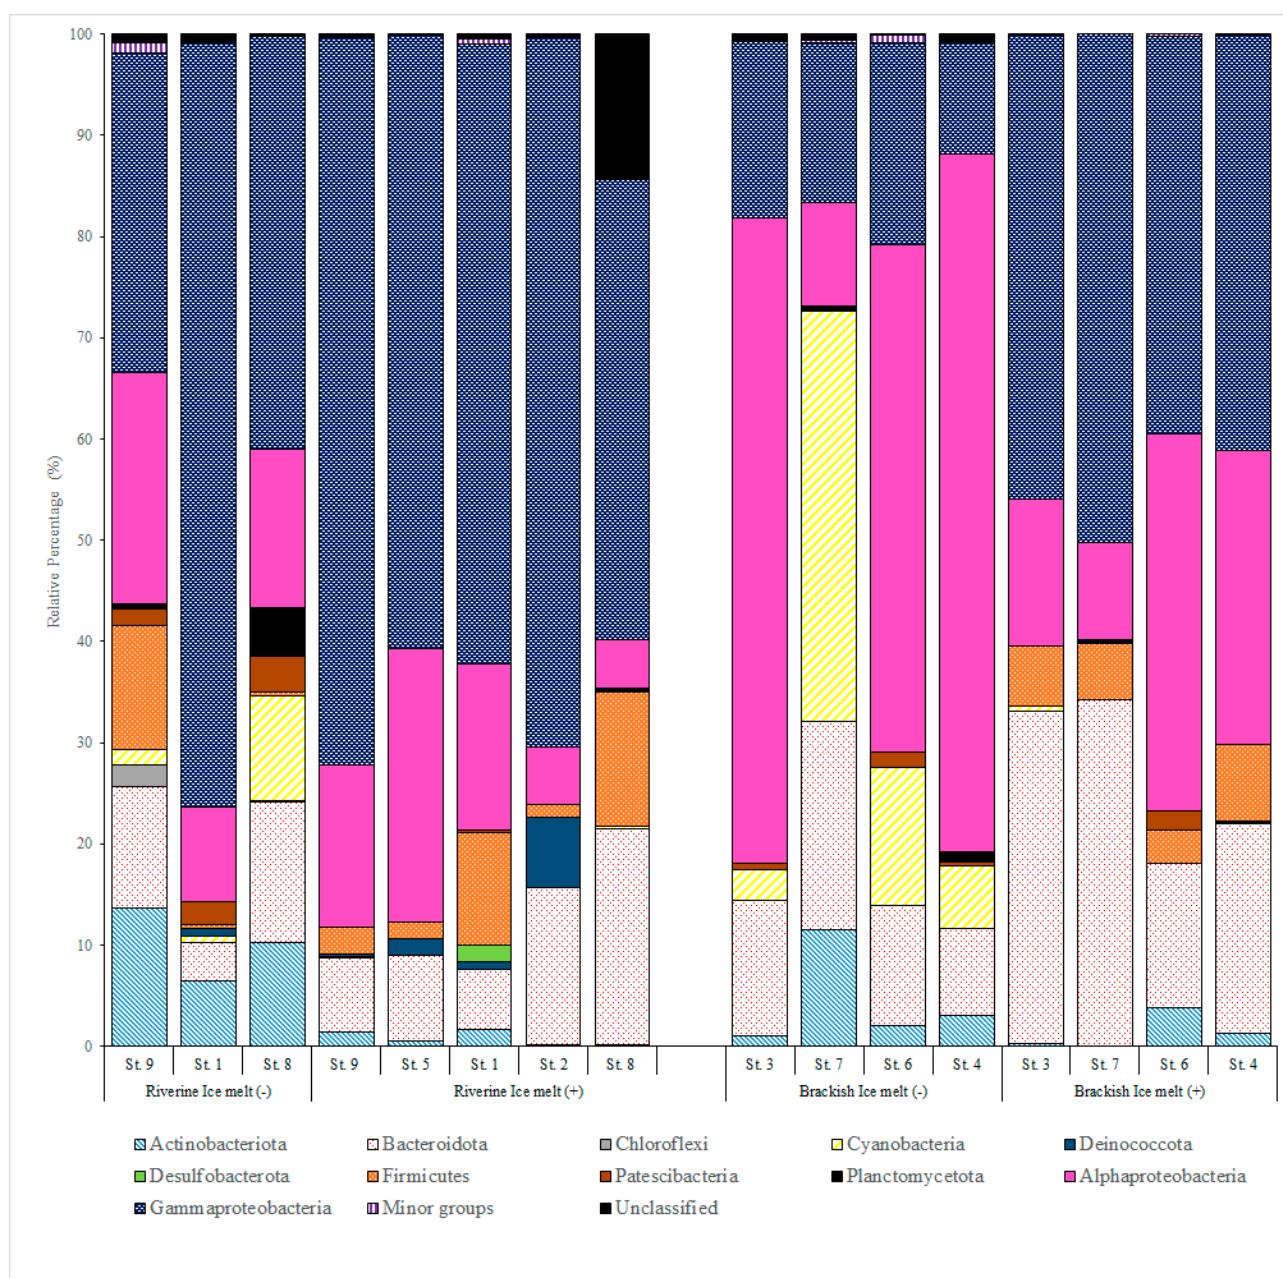

**Supplementary Figure S2.** Phylogenetic groups retrieved in Ice-melt (-) and Ice-melt (+) seasons at each sampling site along the Pasvik River.

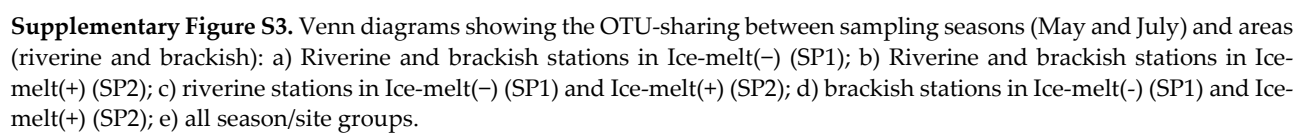

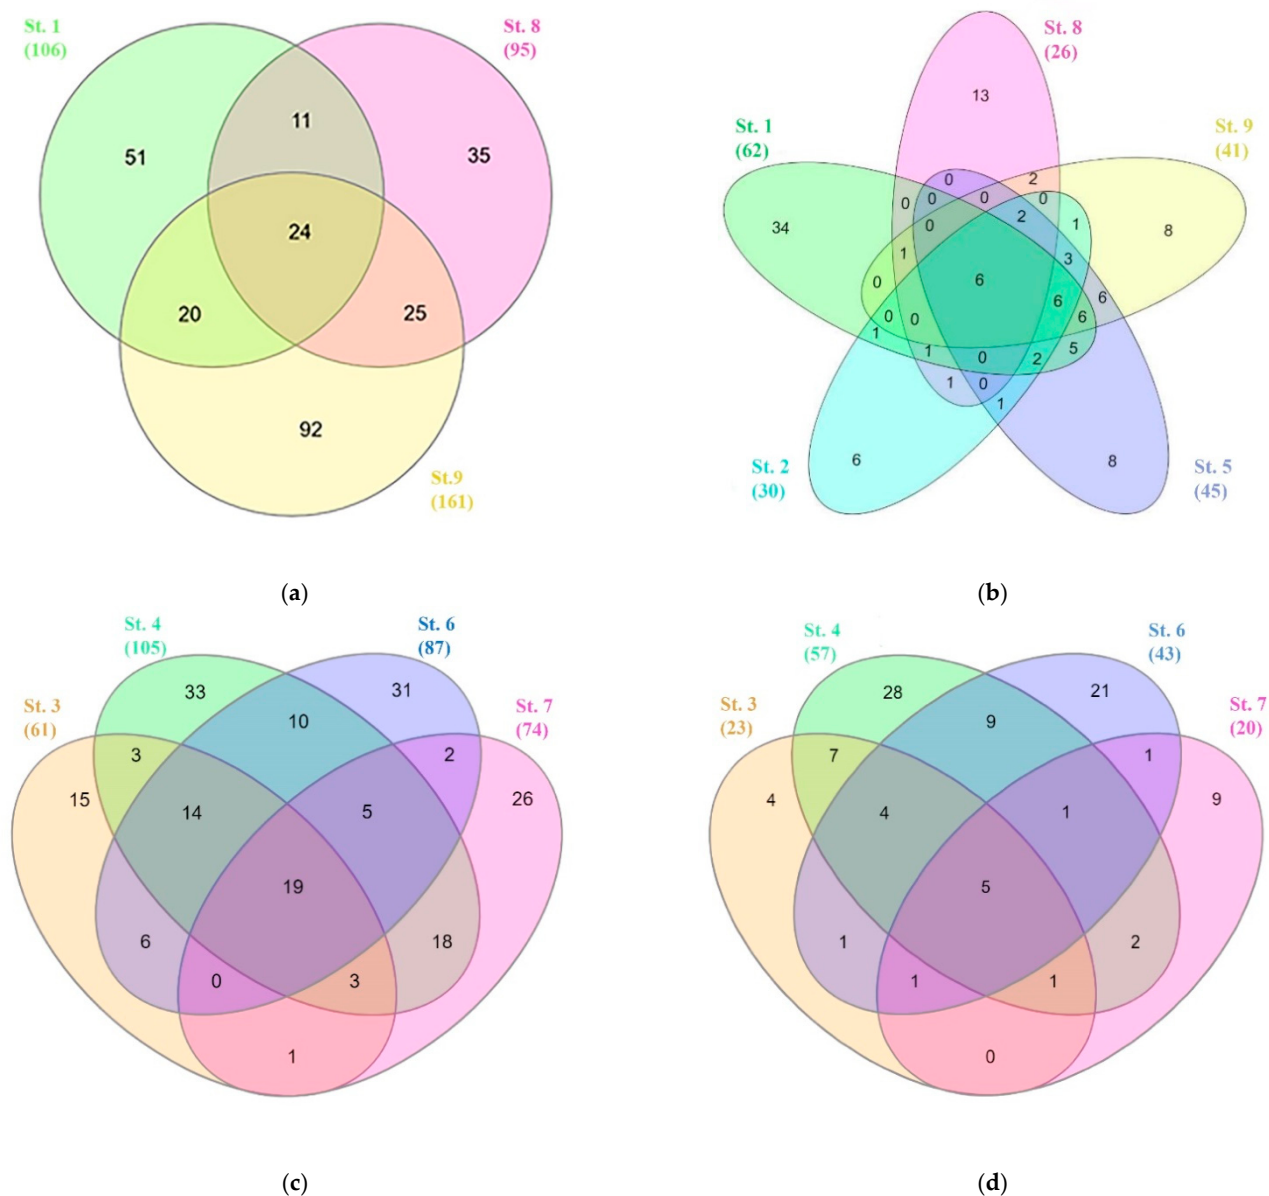

**Supplementary Figure S4.** Venn diagrams representing OUT-sharing between samples: a) riverine stations in Ice-melt(-) (SP1); b) riverine stations in Ice-melt(+) (SP2); c) brackish stations in Ice-melt(-) (SP1); d) brackish stations in Ice-melt(+) (SP2).

**Supplementary Table S1.** Total number of sequence reads, good quality reads, observed numbers of OTUs, Shannon diversity, Evenness and Chao 1 indices *per* sample of the bacterial 16S rRNA gene data sets.

| Morphometric Traits    |             | Riverine Stations |            |            |            | Brackish Stations |            |            |            |            |
|------------------------|-------------|-------------------|------------|------------|------------|-------------------|------------|------------|------------|------------|
|                        |             | St.9              | St.5       | St.1       | St.2       | St.8              | St.3       | St.7       | St.6       | St.4       |
| Total Reads            | Ice-melt(−) | 48548             | nd         | 45035      | nd         | 45074             | 42473      | 45521      | 40981      | 41367      |
|                        | Ice-melt(+) | 50318             | 47010      | 51683      | 57026      | 48050             | 43496      | 46409      | 45338      | 46411      |
| GC (%)                 | Ice-melt(−) | 55                | nd         | 55         | nd         | 54                | 52         | 52         | 53         | 53         |
|                        | Ice-melt(+) | 55                | 55         | 55         | 54         | 54                | 52         | 54         | 55         | 53         |
| Good Quality Reads (%) | Ice-melt(−) | 75.17             | nd         | 78.1       | nd         | 75.79             | 80.63      | 80.62      | 68.67      | 80.93      |
|                        | Ice-melt(+) | 81.3              | 81.94      | 78.99      | 80.31      | 80.48             | 78.07      | 78.07      | 77.7       | 80.91      |
| OTUs                   | Ice-melt(−) | 161               | nd         | 106        | nd         | 95                | 61         | 74         | 87         | 105        |
|                        | Ice-melt(+) | 41                | 45         | 62         | 30         | 26                | 23         | 20         | 43         | 57         |
| Shannon                | Ice-melt(−) | 3.844401          | nd         | 3.128962   | nd         | 3.629881          | 2.620525   | 2.896335   | 3.029794   | 2.799768   |
|                        | Ice-melt(+) | 2.388927          | 2.403478   | 2.40409    | 1.771481   | 2.103197          | 1.742175   | 1.663928   | 2.657487   | 2.519864   |
| Inv simpson            | Ice-melt(−) | 25.41222          | nd         | 13.828827  | nd         | 25.625789         | 7.713027   | 8.672733   | 9.44797    | 6.360254   |
|                        | Ice-melt(+) | 5.270804          | 6.180173   | 5.749307   | 2.99516    | 5.793135          | 4.325539   | 3.360967   | 8.550629   | 7.636652   |
| Evenness               | Ice-melt(−) | 0.75656261        | nd         | 0.67095585 | nd         | 0.79709687        | 0.6374618  | 0.6729301  | 0.6784274  | 0.60158821 |
|                        | Ice-melt(+) | 0.64329619        | 0.63138733 | 0.58250823 | 0.52084034 | 0.6455294         | 0.55562998 | 0.55543265 | 0.70655284 | 0.62325795 |
